# Supplementary material
Source: PubMed Central journal article supplement (PMC5333516)
Supplement: supp_WNL.0000000000003683_Supplementary_Material.pdf [file supp_WNL.0000000000003683_Supplementary_Material.pdf]

## Supplementary Figure e-1. VLSM analysis

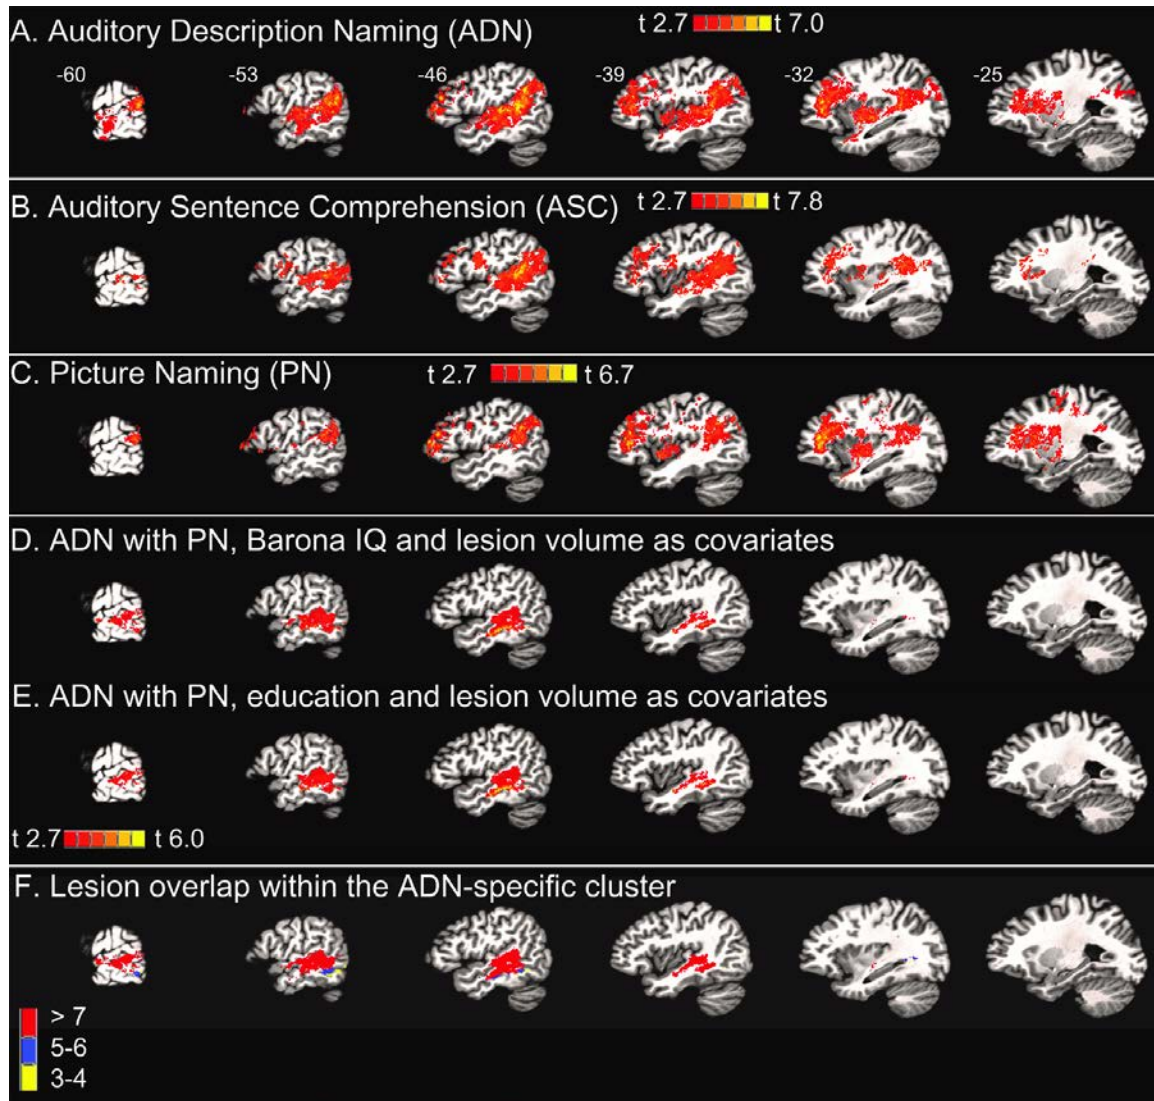

Subscript numbers indicate the x-axis location of the slice in standard space. The same locations are used for the other sagittal series. (A) VLSM analysis using Auditory Description Naming (ADN) accuracy as the dependent measure with no covariates in the model. (B) VLSM analysis using Auditory Sentence Comprehension (ASC) accuracy as the dependent measure with no covariates in the model. Colors indicate *t*-scores. (C) VLSM analysis using Picture Naming (PN) as the dependent measure with no covariates in the model. (D) VLSM analysis using ADN accuracy as the dependent measure with

PN, Barona IQ, and lesion volume as covariates. (E) VLSM analysis using ADN accuracy as the dependent measure with PN, Barona IQ, and lesion volume as covariates. (F) VLSM analysis using ADN accuracy as the dependent measure with PN and lesion volume as covariates shown with lesion voxel overlap threshold. Yellow shows voxels with lesion overlap of 3-4, which comprise a single small cluster in the posterior inferior temporal gyrus. These are the only voxels that would be removed from the results using a lesion overlap threshold of 5 rather than 3. Blue shows voxels with lesion overlap of 5-6, and red shows voxels with lesion overlap  $> 7$ .

**Supplemental Table e-1**  
**Individual subject behavioral data**

| Subj # | Age | Sex | Educ. | B-IQ | HQ  | Sinis. | DPO    | No. of<br>Lesioned<br>Voxels | % Accuracy |       |                               |
|--------|-----|-----|-------|------|-----|--------|--------|------------------------------|------------|-------|-------------------------------|
|        |     |     |       |      |     |        |        |                              | ADN        | PN    | Auditory<br>Sentence<br>Comp. |
| 1      | 80  | M   | 17    | 123  | 100 | N      | 657.8  | 46,937                       | 65.0       | 73.8  | 83.9                          |
| 2      | 28  | F   | 14    | 103  | 83  | N      | 961.3  | 85,388                       | 73.3       | 95.0  | 69.6                          |
| 3      | 48  | F   | 14    | 106  | 100 | -      | 252.5  | 68,407                       | 13.3       | 18.8  | 55.4                          |
| 4      | 55  | F   | 12    | 103  | 83  | Y      | 3052.8 | 87,201                       | 0.0        | 65.0  | 48.2                          |
| 5      | 49  | F   | 14    | 100  | 100 | Y      | 254.8  | 24,230                       | 83.3       | 95.0  | -                             |
| 6      | 52  | F   | 24    | 129  | 83  | Y      | 210    | 10,416                       | 96.7       | 93.8  | -                             |
| 7      | 66  | F   | 12    | 105  | 83  | N      | 838.8  | 56,517                       | 15.0       | 17.5  | -                             |
| 8      | 61  | F   | 19    | 125  | 79  | N      | 726    | 32,580                       | 95.0       | 100.0 | 94.6                          |
| 9      | 66  | F   | 16    | 118  | 100 | Y      | 3527.7 | 26,131                       | 98.3       | 100.0 | 92.9                          |
| 10     | 55  | M   | 14    | 113  | 100 | Y      | 1675.7 | 130,491                      | 31.7       | 66.3  | 69.6                          |
| 11     | 45  | F   | 12    | 98   | 60  | N      | 253    | 72,010                       | 93.3       | 93.8  | 75.0                          |
| 12     | 60  | M   | 14    | 113  | 90  | N      | 635.2  | 62,845                       | 98.3       | 73.8  | 85.7                          |
| 13     | 72  | M   | 14.5  | 115  | 100 | Y      | 251.2  | 23,355                       | 26.7       | 27.5  | -                             |
| 14     | 62  | M   | 14    | 110  | 100 | N      | 449.7  | 71,445                       | 51.7       | 80.0  | 60.7                          |
| 15     | 63  | F   | 16    | 116  | 100 | N      | 934    | 33,329                       | 35.0       | 58.8  | 92.9                          |
| 16     | 52  | M   | 12    | 101  | 100 | N      | 843    | 74,148                       | 36.7       | 46.3  | 78.6                          |
| 17     | 60  | M   | 12    | 107  | 79  | N      | 185.2  | 72,811                       | 0.0        | 0.0   | -                             |
| 18     | 77  | M   | 16    | 118  | 4   | Y      | 638.5  | 18,597                       | 68.3       | 77.5  | 33.3                          |
| 19     | 63  | F   | 12    | 105  | 92  | N      | 388.7  | 176,674                      | 0.0        | 0.0   | 48.2                          |
| 20     | 40  | F   | 15.5  | 110  | 83  | N      | 6732.3 | 156,674                      | 83.3       | 90.0  | 66.1                          |
| 21     | 57  | F   | 12    | 106  | 83  | N      | 2495   | 68,337                       | 93.3       | 98.8  | 80.4                          |
| 22     | 84  | F   | 13    | 116  | 86  | N      | 430.2  | 15,368                       | 76.7       | 95.0  | 80.4                          |
| 23     | 65  | M   | 8     | 85   | 100 | N      | 233    | 95,698                       | 30.0       | 78.8  | 60.7                          |
| 24     | 38  | F   | 18    | 114  | 100 | Y      | 1277.7 | 226,978                      | 0.0        | 31.3  | -                             |
| 25     | 57  | M   | 13    | 110  | 4   | N      | 2049.3 | 13,816                       | 91.7       | 98.8  | 91.1                          |
| 26     | 51  | M   | 11    | 105  | 100 | Y      | 310.3  | 22,229                       | 83.3       | 98.8  | 78.6                          |
| 27     | 54  | F   | 16    | 117  | 92  | N      | 2733   | 87,289                       | 70.0       | 72.5  | 76.8                          |
| 28     | 66  | M   | 16    | 110  | 100 | N      | 222.8  | 51,301                       | 6.7        | 7.5   | 51.8                          |
| 29     | 72  | F   | 16    | 119  | 100 | N      | 200.7  | 7,723                        | 86.7       | 87.5  | 82.1                          |
| 30     | 42  | F   | 13    | 106  | 83  | N      | 272.8  | 38,776                       | 76.7       | 96.3  | 91.1                          |
| 31     | 56  | M   | 14    | 104  | 33  | N      | 1174.7 | 184,005                      | 33.3       | 28.8  | 60.7                          |
| 32     | 58  | M   | 12    | 101  | 100 | Y      | 580    | 27,449                       | 86.7       | 87.5  | 87.5                          |
| 33     | 54  | M   | 11.5  | 100  | 81  | N      | 822    | 113,329                      | 68.3       | 67.5  | 50.0                          |
| 34     | 78  | F   | 14    | 113  | 100 | N      | 585.8  | 112,788                      | 0.0        | 0.0   | 51.8                          |
| 35     | 58  | M   | 14    | 107  | 92  | Y      | 560    | 131,733                      | 53.3       | 90.0  | 51.8                          |
| 36     | 38  | M   | 12    | 90   | 100 | Y      | 329.2  | 113,763                      | 76.7       | 76.3  | 91.1                          |
| 37     | 48  | M   | 15    | 104  | 100 | Y      | 174.8  | 45,489                       | 81.7       | 83.8  | 89.3                          |
| 38     | 81  | F   | 12    | 109  | 100 | N      | 233.5  | 1,624                        | 95.0       | 100.0 | 96.4                          |
| 39     | 81  | M   | 13    | 113  | 100 | N      | 227.4  | 79,912                       | 0.0        | 57.5  | 60.7                          |
| 40     | 44  | F   | 18    | 120  | 100 | N      | 173.5  | 45,131                       | 96.3       | 87.5  | 87.5                          |
| 41     | 51  | F   | 16    | 116  | 100 | N      | 3463   | 830                          | 98.3       | 98.8  | 96.4                          |
| 42     | 69  | M   | 13    | 106  | 100 | N      | 214.3  | 48,220                       | 61.7       | 61.3  | 69.6                          |
| 43     | 54  | M   | 14    | 112  | 81  | Y      | 1963   | 25,055                       | 98.3       | 97.5  | 83.9                          |
| 44     | 77  | M   | 24    | 132  | 100 | N      | 303    | 7,898                        | 100.0      | 97.5  | 89.3                          |
| 45     | 76  | M   | 16    | 120  | 100 | N      | 1914   | 17,143                       | 95.0       | 95.0  | 80.4                          |
| 46     | 57  | F   | 12    | 104  | 100 | N      | 214    | 8,050                        | 83.3       | 87.5  | 91.1                          |
| 47     | 57  | M   | 14    | 111  | 56  | Y      | 615    | 6,711                        | 98.3       | 100.0 | 83.9                          |
| 48     | 74  | M   | 12    | 95   | 100 | -      | 205    | 54,389                       | 0.0        | 17.5  | -                             |
| 49     | 50  | F   | 15    | 109  | 100 | N      | 234    | 848                          | 98.3       | 97.5  | 91.1                          |
| 50     | 63  | F   | 15    | 114  | 100 | N      | 235    | 1,008                        | 100.0      | 100.0 | 89.3                          |
| 51     | 56  | M   | 12    | 106  | 70  | N      | 433    | 3,576                        | 91.7       | 86.3  | 80.4                          |

*B-IQ = Barona IQ estimate, HQ = Edinburgh Handedness Inventory handedness*

*quotient, Sinis = Sinistrality, DPO = Days post onset, ADN = Auditory Description*

*Naming, PN = Picture Naming*

**Supplemental Table e-2**  
**Descriptive statistics for Picture and Auditory Description Naming items**

| Task                        | Letters     | Log10Freq   | Imageability |
|-----------------------------|-------------|-------------|--------------|
| Picture Naming              | 5.36 (1.77) | 1.12 (0.64) | 6.08 (0.30)  |
| Living                      | 5.17 (1.79) | 1.26 (0.65) | 6.16 (0.23)  |
| Non-living                  | 5.58 (1.73) | 0.98 (0.60) | 5.97 (0.34)  |
| Auditory Description Naming | 5.23 (1.79) | 0.93 (0.53) | 6.05 (0.42)  |
| Living                      | 5.27 (1.89) | 0.89 (0.54) | 6.16 (0.46)  |
| Non-living                  | 5.20 (1.71) | 0.97 (0.52) | 5.94 (0.35)  |

Values shown are means and standard deviations in parentheses. *Letters* indicates number of letters. *Log10 Freq* indicates base-10 logarithm of orthographic word frequency per million words (Baayen, Piepenbrock, & Gulikers, 1995). *Imageability* indicates rated imageability on a scale from 1 to 7, compiled from published norms (Bird, Franklin, & Howard, 2001; Clark & Paivio, 2004; Cortese & Fugett, 2004; Wilson, 1988).

**Supplemental Table e-3****Peak coordinates of sites associated with ADN and ASC**

| <b>ADN, no covariates</b>                            |               | <b>Coordinates</b> |          |          |
|------------------------------------------------------|---------------|--------------------|----------|----------|
| <i>Structure</i>                                     | <i>t-stat</i> | <i>x</i>           | <i>y</i> | <i>z</i> |
| Supramarginal gyrus                                  | 7.030         | -46                | -49      | 26       |
| Superior temporal gyrus                              | 6.494         | -48                | -43      | 12       |
| Superior temporal gyrus                              | 6.423         | -45                | -27      | 7        |
| Middle frontal gyrus                                 | 5.882         | -31                | 36       | 18       |
| Subinsular white matter                              | 5.661         | -33                | -14      | -3       |
| Posterior temporal white matter                      | 5.570         | -35                | -40      | 5        |
| Inferior frontal white matter                        | 5.401         | -22                | 21       | 15       |
| Subinsular white matter                              | 5.400         | -30                | -1       | 8        |
| Inferior frontal white matter                        | 5.186         | -32                | 34       | 3        |
| <b>ADN with PN &amp; lesion volume as covariates</b> |               | <b>Coordinates</b> |          |          |
| <i>Structure</i>                                     | <i>t-stat</i> | <i>x</i>           | <i>y</i> | <i>z</i> |
| Mid-temporal white matter                            | 6.286         | -45                | -25      | -10      |
| Anterior temporal white matter                       | 5.701         | -39                | -9       | -12      |
| Posterior temporal white matter                      | 5.517         | -35                | -46      | 0        |
| <b>ASC with PN as covariate</b>                      |               | <b>Coordinates</b> |          |          |
| <i>Structure</i>                                     | <i>t-stat</i> | <i>x</i>           | <i>y</i> | <i>z</i> |
| Middle temporal gyrus                                | 6.536         | -48                | -41      | 7        |
| Posterior superior temporal sulcus                   | 5.538         | -53                | -42      | 8        |

---

*ADN = Auditory Description Naming, ASC = Auditory Sentence Comprehension,  
PN = Picture Naming*
